# Supplementary material for: Study on synergistic hydrogen generation from aluminum-based composites in different forms of water
Source: Royal Society of Chemistry journal article supplement (doi:10.1039/d3cp05429b), 2024-01-01
Supplement: d3cp05429b1.pdf [file d3cp05429b1.pdf]

## Supplementary Materials

### **Study on the synergistic hydrogen generation from aluminum-based composites in different forms of water**

Chong Chen <sup>a</sup>, Jiaxin Lu <sup>a</sup>, Bobo Zhang <sup>a</sup>, Taixin Liang <sup>a</sup>, Fei Xiao <sup>a\*</sup>

*<sup>a</sup> School of Environment and Safety Engineering, North University of China, Taiyuan  
030051, Shanxi, China*

---

\* Corresponding author.

*E-mail address:* 15510716330@163.com

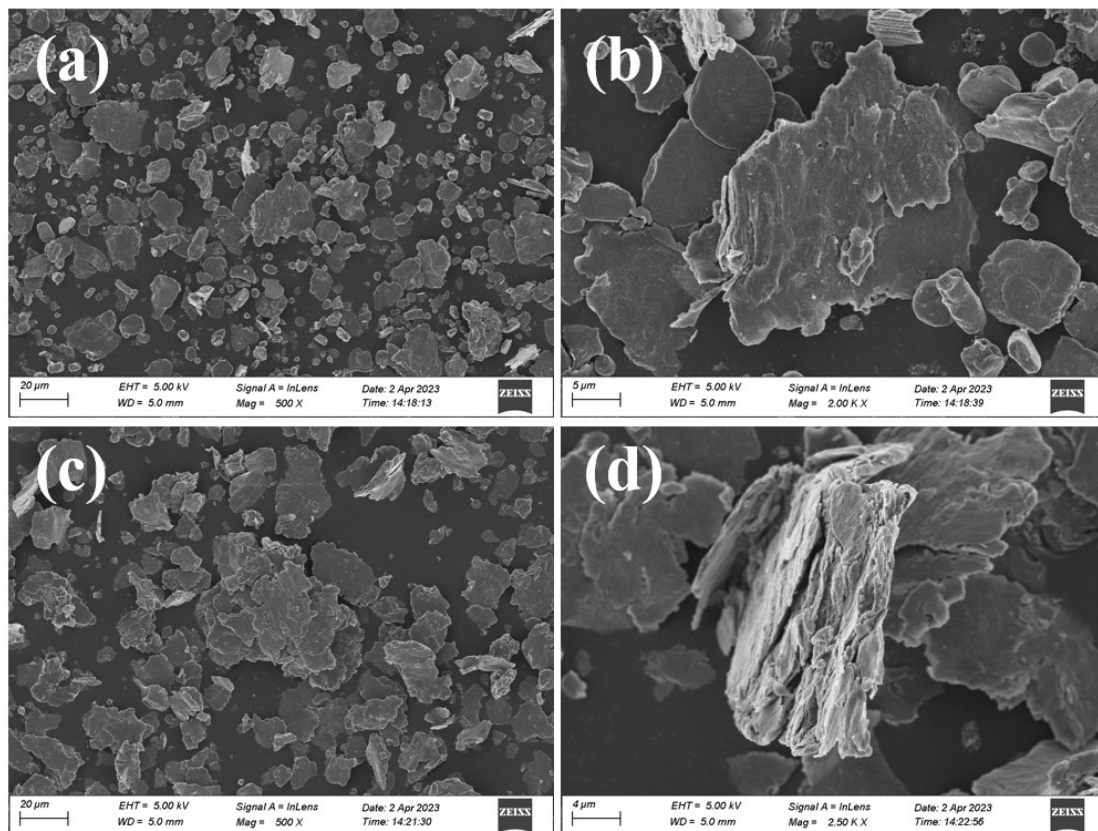

Fig. S1. The SEM images of Al/Bi/CNT (a) and (b) milling for 1 h, (c) and (d) milling for 3 h.

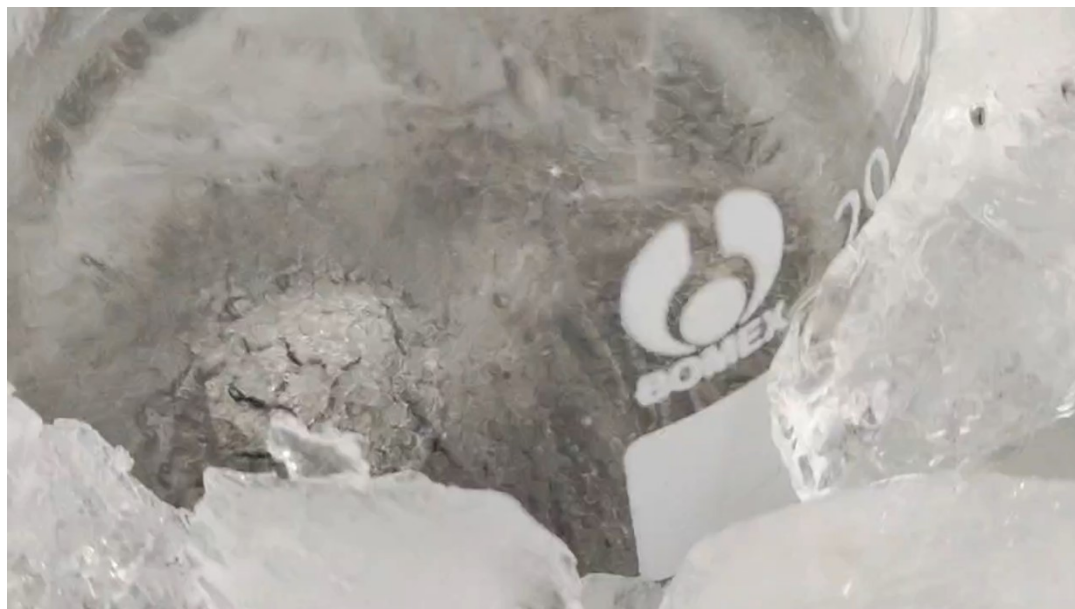

Fig. S2 (video). The reaction process of Al/Bi/CNT on the ice.

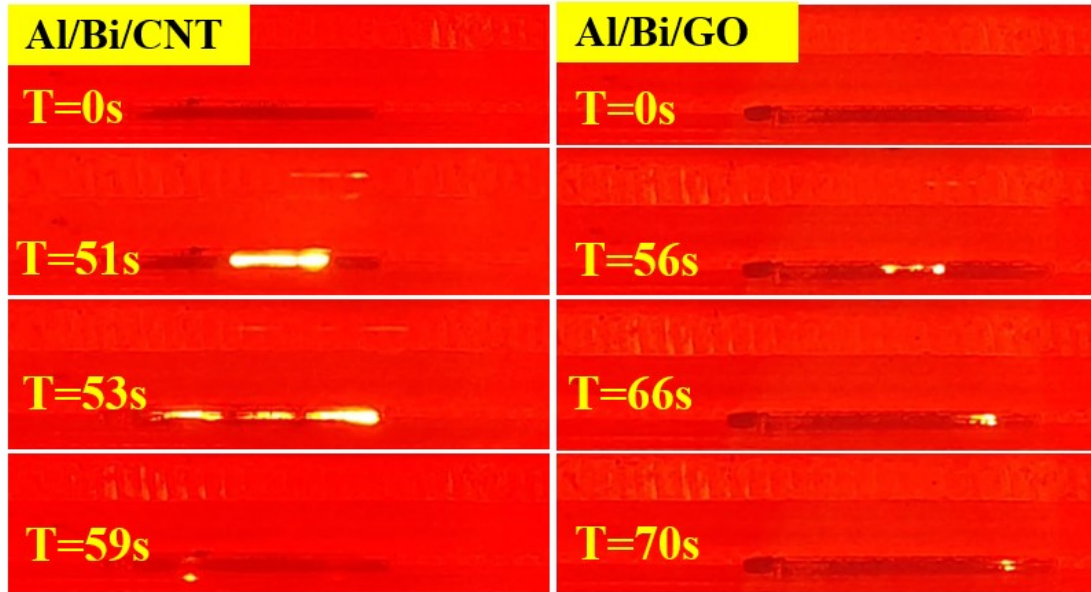

Fig. S3. The reaction process of Al-based composites in high temperature steam.
